# Supplementary material for: An electron transporting unit linked multifunctional Ir(iii) complex: a promising strategy to improve the performance of solution-processed phosphorescent organic light-emitting diodes
Source: Royal Society of Chemistry journal article supplement (doi:10.1039/c3cc49796h), 2014-01-01
Supplement: c3cc49796h1.pdf [file c3cc49796h1.pdf]

## Supporting Information

### **Electron transporting unit linked multifunctional heteroleptic Ir(III) complex: A promising strategy to improve the performance of solution-processed phosphorescent organic light-emitting diodes**

Thota Giridhar,<sup>a</sup> Chinnusamy Saravanan,<sup>a</sup> Woosum Cho,<sup>a</sup> Young Geun Park,<sup>b</sup> Jin Yong Lee,<sup>\*b</sup> and Sung-Ho Jin<sup>\*a</sup>

<sup>a</sup>Department of Chemistry Education, Graduate Department of Chemical Materials, and Institute for Plastic Information and Energy Materials, Pusan National University, Busan, 609-735, Republic of Korea

<sup>b</sup>Department of Chemistry, Sungkyunkwan University, Suwon 440-746, Republic of Korea

## Experimental section

### General Information

All chemicals and reagents were purchased from Aldrich Chemical Co., and it was used without further purification. The dimer (**4**) was synthesized using the procedure we have developed previously<sup>1</sup> and 4-(5-phenyl-1,3,4-oxadiazol-2-yl)phenol (**9**) was synthesized by the reported procedure.<sup>2</sup> All reactions were systematically monitored by thin layer chromatography with Merck precoated aluminum plates. <sup>1</sup>H and <sup>13</sup>C NMR spectra were recorded on a Varian Mercury Plus 300 MHz spectrometer in CDCl<sub>3</sub> using tetramethylsilane as an internal standard. High resolution mass spectra were obtained from the Korea Basic Science and Institute, Daegu Center (HR-ESI Mass). TGA and DSC thermograms were obtained with Mettler Toledo TGA/SDTA 851e and DSC 822e analyzer under N<sub>2</sub> atmosphere at a heating rate of 10 °C/min, respectively. The UV–visible absorption and the fluorescence spectra were recorded with a JASCO V–570 and Hitachi F–4500 fluorescence spectrophotometers at room temperature, respectively. Cyclic voltammetry (CV) measurements were performed with a CHI 600C potentiostat (CH Instruments), which is equipped with a platinum disc as the working electrode, a platinum wire as the counter electrode, and a Ag/AgCl as the reference electrode, at a scan rate of 100 mV/s using anhydrous methylene chloride (MC) and 0.1 M tetrabutylammonium tetrafluoroborate (TBABF<sub>4</sub>) as the solvent and electrolyte, respectively. The potentials were referenced to the ferrocene/ferrocenium redox couple (Fc/Fc<sup>+</sup>). It was assumed that the redox potential of Fc/Fc<sup>+</sup> had an absolute energy level of –4.8 eV under vacuum. All electrochemical experiments were carried out at room temperature.

### Synthesis of (4-phenyl-2-(thiophen-2-yl)quinoline) (**3**)

A mixture of 1-(thiophen-2-yl)ethanone (3 g, 23.78 mmol), 2-aminobenzophenone (4.69 g, 23.78 mmol), diphenyl phosphate (5.95 g, 23.78 mmol), and *m*-cresol (30 mL) was flushed with N<sub>2</sub> while stirring at room temperature for 30 min and then refluxed for 12 hr at 140 °C. The reaction mixture was distilled to remove *m*-cresol, residue was diluted with MC and washed with 10% sodium hydroxide solution. The reaction mixture was washed with sodium chloride solution and the resulting organic layer was dried over anhydrous MgSO<sub>4</sub> and evaporated the solvent. The residue was then purified by column chromatography on silica gel (hexane:ethyl acetate (EA), 9:1 v/v) to furnish an off-white powder **3** (5.1 g, 74%).

<sup>1</sup>H NMR (300 MHz, CDCl<sub>3</sub>): δ (ppm) 8.19-8.16 (d, 1H), 8.06-8.05 (dd, 1H), 7.90-7.86 (m, 2H), 7.74-7.69 (m, 2H), 7.56-7.51 (m, 5H), 7.48-7.43 (m, 2H); <sup>13</sup>C NMR (300 MHz, CDCl<sub>3</sub>): δ (ppm) 152.11, 149.29, 148.88, 145.64, 138.42, 129.88, 129.74, 128.84, 128.78, 128.70, 128.30, 126.36, 126.11, 125.91, 118.14. HRESI-MS [M+H]<sup>+</sup>: m/z Found 288.08, Calcd for 287.38.

#### **General procedure for the synthesis of cyclometalated Ir(III) μ-chloride bridged dimer (**4**)**

The general procedure for the synthesis of cyclometalated Ir(III) μ-chloride bridged dimer complexes is as follows: the compound **3** (5 g, 17.40 mmol) and IrCl<sub>3</sub>·H<sub>2</sub>O (2.08 g, 6.96 mmol) were added to a mixture of 2-ethoxyethanol and water (80 mL, 3:1 v/v). The resulting mixture was refluxed at 140 °C for 20 hr under an N<sub>2</sub> atmosphere and cooled to room temperature. The formed red solid was filtered, washed with water followed by methanol. Subsequently, the solid was dried under vacuum at 120 °C to afford cyclometalated Ir(III) μ-chloride bridged dimer (**4**) as a red solid (3.36 g, 60 %).

#### **Synthesis of bis[4-phenyl-2-(thiophen-2-yl)quinoline]iridium picolinate (TPQIr)**

The compound **4** (1 g, 0.62 mmol), picolinic acid (0.23 g, 1.87 mmol), and K<sub>2</sub>CO<sub>3</sub> (0.86 g, 6.2 mmol) in 2-ethoxyethanol (20 mL) was stirred at room temperature for 8 hr under a N<sub>2</sub>

atmosphere. After completing the reaction, the mixture was poured into water and extracted with MC. The organic layer was dried over anhydrous  $\text{MgSO}_4$ , filtered, and removed the solvent under reduced pressure. The crude product was purified by silica gel column chromatography using ethylacetate (EA):MC:hexane (2:4:4, v/v/v) as an eluent to furnish a red powder **TPQIr** (0.3 g, 54%).

$^1\text{H}$  NMR (300 MHz,  $\text{CDCl}_3$ ):  $\delta$  (ppm) 8.80-8.77 (d, 1H), 7.98-7.95 (m, 2H), 7.76-7.68 (m, 4H), 7.63 (s, 1H), 7.59-7.57 (m, 11H), 7.42-7.30 (m, 4H), 7.20-7.12 (q, 3H), 6.86 (t, 1H), 6.67-6.66 (d, 1H), 6.20-6.18 (d, 1H);  $^{13}\text{C}$  NMR (300 MHz,  $\text{CDCl}_3$ ):  $\delta$  (ppm) 172.53, 166.72, 165.35, 153.67, 153.59, 153.04, 151.39, 151.35, 149.93, 149.02, 147.03, 141.58, 139.31, 137.95, 137.48, 137.44, 134.84, 133.61, 132.09, 130.90, 130.03, 129.88, 129.21, 129.08, 128.95, 127.97, 127.70, 127.55, 126.48, 126.38, 125.76, 125.64, 124.85, 124.64, 124.14, 117.97, 116.99. IR (NaCl cell,  $\text{cm}^{-1}$ ): 3057, 2355, 1663, 1593, 1541, 1496, 1450, 1427, 1335, 1243, 1145, 1070, 887, 772, 726, 698, 588. Calcd for  $\text{C}_{44}\text{H}_{28}\text{IrN}_3\text{O}_2\text{S}_2$ : C, 59.58; H, 3.18; N, 4.74. Found: C, 59.54; H, 3.12; N, 4.72. HRESI-MS  $[\text{M}+\text{H}]^+$ : m/z Found 887.1254, Calcd for 887.1251.

### Synthesis of bis[4-phenyl-2-(thiophen-2-yl)quinoline]iridium-4-Cl-picolinate (**5**)

The compound **4** (2.3 g, 1.44 mmol), 4-chloropicolinic acid (0.68 g, 4.31 mmol), and  $\text{K}_2\text{CO}_3$  (1.99 g, 14.4 mmol) in 2-ethoxyethanol (20 mL) was stirred at room temperature for 8 hr under a  $\text{N}_2$  atmosphere. After completing the reaction, the mixture was poured into water and extracted with MC. The organic layer was dried over anhydrous  $\text{MgSO}_4$ , filtered, and removed the solvent under reduced pressure. The crude product was purified by silica gel column chromatography using EA:MC:hexane (1:5:4, v/v/v) as an eluent to afford a red powder **5** (0.84 g, 63%).

$^1\text{H}$  NMR (300 MHz,  $\text{CDCl}_3$ ):  $\delta$  (ppm) 8.73-8.70 (d, 1H), 7.96 (s, 1H), 7.85-7.83 (d, 1H), 7.75-7.72 (d, 2H), 7.67-7.63 (m, 3H), 7.61-7.55 (m, 10H), 7.39-7.33 (m, 3H), 7.22-7.15 (m, 3H), 6.96-

6.95 (m, 1H), 6.66-6.64 (m, 1H), 6.19-6.17 (m, 1H);  $^{13}\text{C}$  NMR (300 MHz,  $\text{CDCl}_3$ ):  $\delta$  (ppm) 171.8, 166.6, 165.2, 154.38, 152.91, 152.82, 151.57, 149.80, 148.96, 147.64, 146.51, 141.52, 139.29, 137.40, 137.36, 134.79, 133.5, 132.20, 130.99, 130.09, 130.01, 129.87, 129.27, 129.13, 128.98, 128.34, 128.27, 126.52, 126.36, 125.88, 125.68, 124.94, 124.79, 117.98, 116.9. Calcd for  $\text{C}_{44}\text{H}_{27}\text{ClIrN}_3\text{O}_2\text{S}_2$ : C, 57.35; H, 2.95; N, 4.56. Found: C, 57.24; H, 2.82; N, 4.52. HRESI-MS  $[\text{M}+\text{H}]^+$ : m/z Found 921.4926, Calcd for 921.4922.

**Synthesis of bis[4-phenyl-2-(thiophen-2-yl)quinoline]iridium-4-(4-(5-phenyl-1,3,4-oxadiazol-2-yl)phenoxy)picolinate (TPQIr-ET)**

The compound **5** (1 g, 0.57 mmol), 4-(5-phenyl-1,3,4-oxadiazol-2-yl)phenol (**6**) (1 g, 0.57 mmol), and  $\text{K}_2\text{CO}_3$  (0.60 g, 5.7 mmol) in DMF (10 mL) was stirred at 80 °C over night under a  $\text{N}_2$  atmosphere. After completing the reaction, the mixture was cooled, poured into water and extracted with MC. The organic layer was dried over anhydrous  $\text{MgSO}_4$ , filtered, and removed the solvent under reduced pressure. The crude product was purified by silica gel column chromatography using EA:MC:hexane (3:5:2, v/v/v) as an eluent to furnish a red powder **TPQIr-ET** (0.36 g, 59%).

$^1\text{H}$  NMR (300 MHz,  $\text{CDCl}_3$ ):  $\delta$  (ppm) 8.80-8.77 (d, 1H), 8.17-8.15 (m, 4H), 7.87-7.85 (d, 1H), 7.81-7.77 (m, 3H), 7.71 (s, 1H), 7.65-7.57 (m, 16H), 7.41-7.36 (m, 3H), 7.19-7.17 (m, 3H), 7.07-7.02 (m, 2H), 6.70-6.69 (d, 1H), 6.21-6.19 (d, 1H);  $^{13}\text{C}$  NMR (300 MHz,  $\text{CDCl}_3$ ):  $\delta$  (ppm) 171.81, 166.86, 165.55, 155.96, 153.57, 151.40, 150.04, 149.05, 139.25, 137.49, 133.62, 132.11, 130.94, 129.88, 129.55, 129.36, 129.03, 128.98, 127.24, 126.63, 126.41, 125.76, 124.93, 124.02, 122.12, 121.69, 115.24. IR (NaCl cell,  $\text{cm}^{-1}$ ): 3057, 2355, 1652, 1596, 1539, 1495, 1452, 1425, 1325, 1290, 1242, 1203, 885, 846, 767, 732, 702, 584. Calcd for  $\text{C}_{58}\text{H}_{36}\text{IrN}_5\text{O}_4\text{S}_2$ : C, 62.02; H,

3.23; N, 6.23. Found: C, 62.01; H, 3.21; N, 6.20. HRESI-MS  $[M+H]^+$ :  $m/z$  Found 1123.2761, Calcd for 1123.2760.

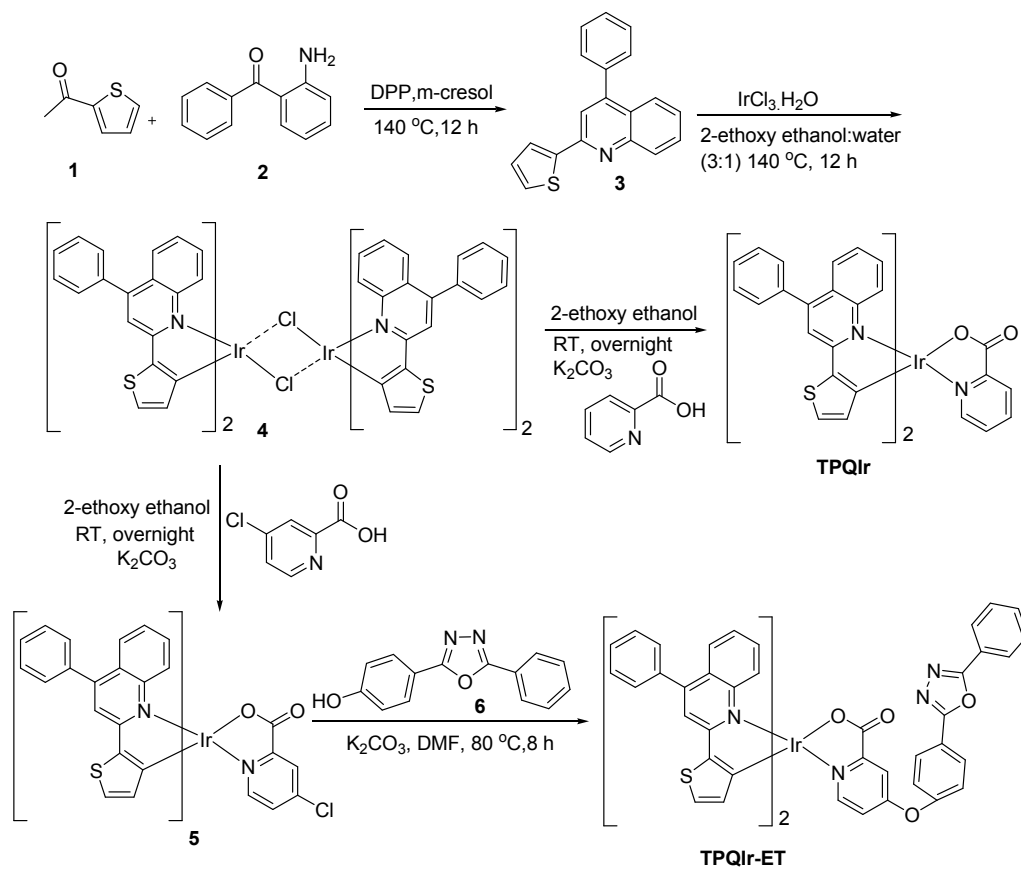

**Scheme S1.** Synthesis of **TPQIr** and **TPQIr-ET**.

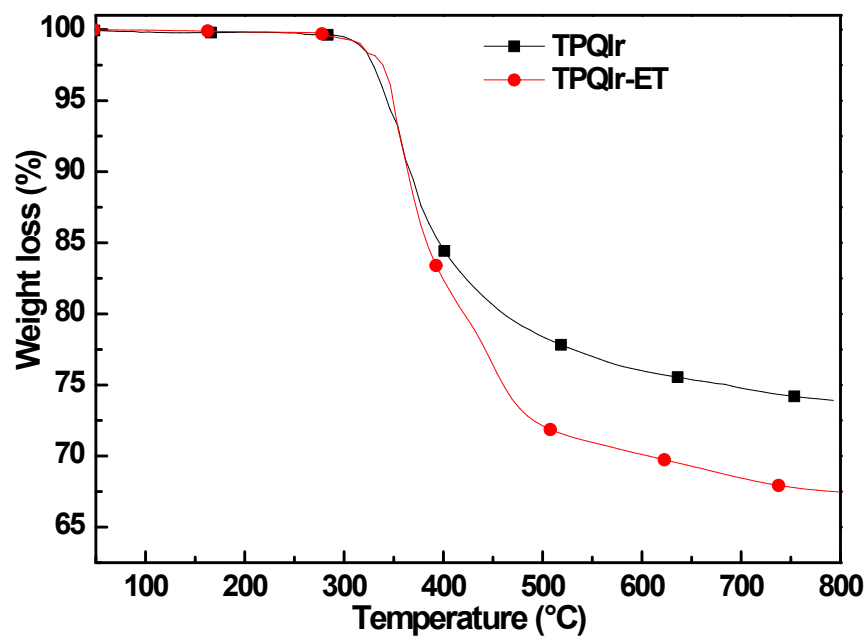

Fig. S1. TGA thermograms of TPQIr and TPQIr-ET measured at 10 °C/min under N<sub>2</sub>.

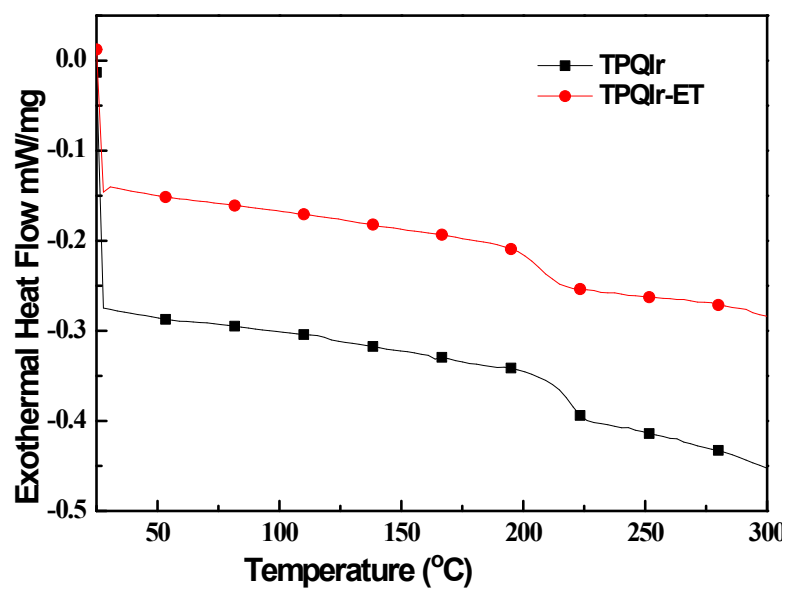

Fig. S2. DSC thermograms of TPQIr and TPQIr-ET measured at 10 °C/min under N<sub>2</sub>.

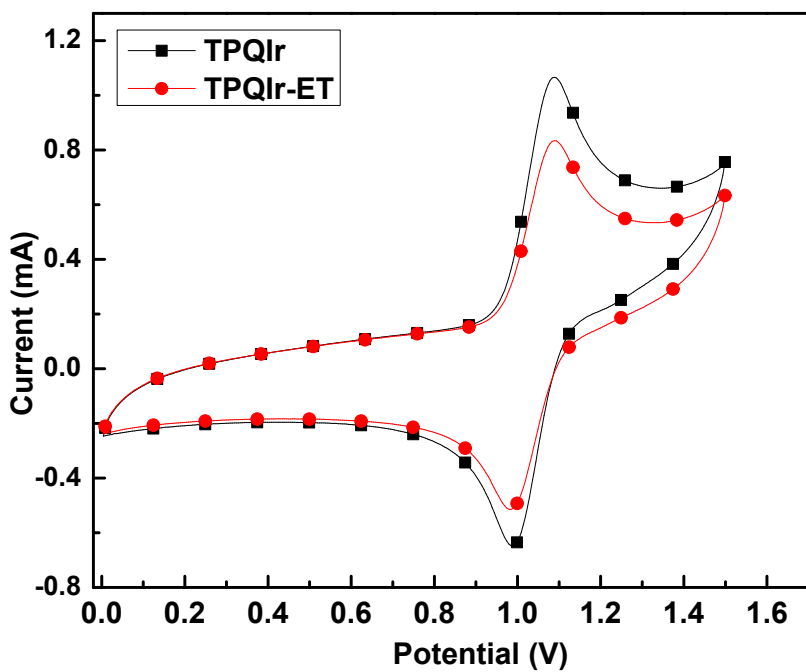

**Fig. S3.** Cyclic voltammograms of **TPQIr** and **TPQIr-ET** measured in MC at a scan rate of 100 mV/s.

| Complex  | HOMO                                                                               | LUMO                                                                                |
|----------|------------------------------------------------------------------------------------|-------------------------------------------------------------------------------------|
| TPQIr    | 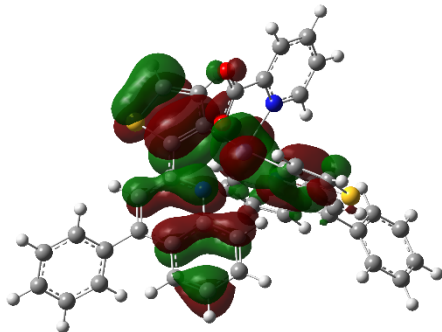  | 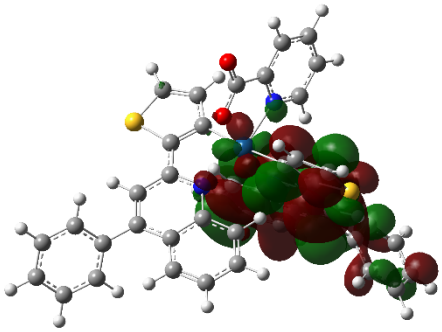  |
| TPQIr-ET | 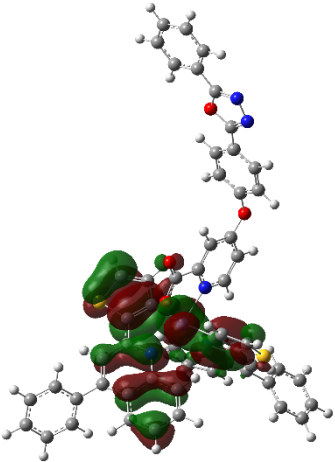 | 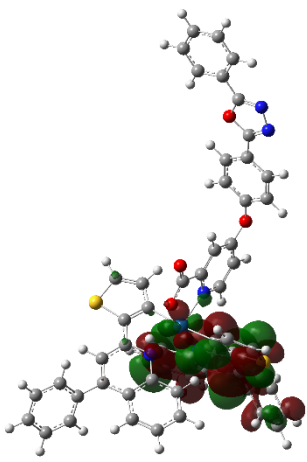 |

**Fig. S4.** Calculated HOMOs and LUMOs of **TPQIr** and **TPQIr-ET**.

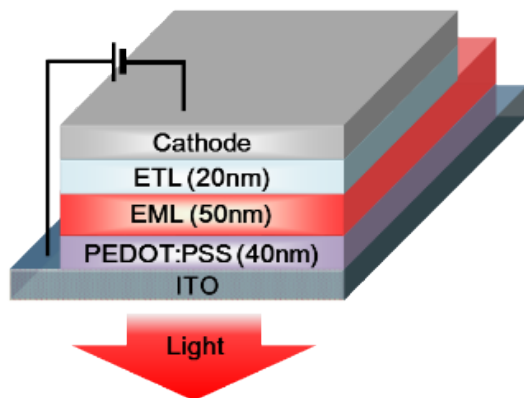

**Fig. S5.** Schematic illustration of solution-processed deep-red PhOLEDs.

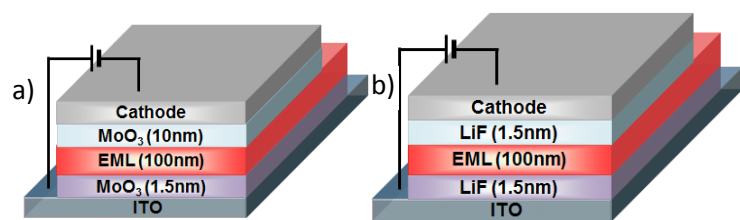

**Fig. S6.** Device configuration of a) hole [ITO/MoO<sub>3</sub>/TPQIr or TPQIr-ET/MoO<sub>3</sub>/Al (100 nm)] and b) electron [ITO/LiF/TPQIr or TPQIr-ET/LiF/Al (100 nm)] only devices.

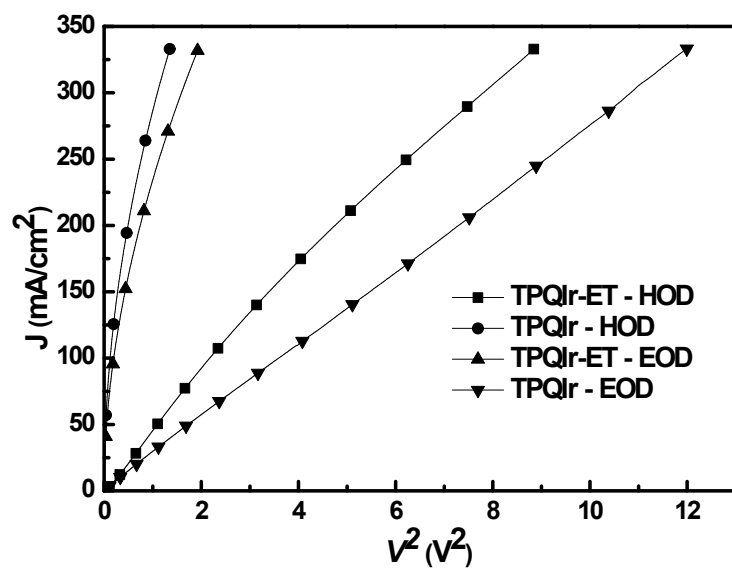

Fig S7. J-V characteristics of hole and electron only devices of TPQIr or TPQIr-ET.

**Table S1.** Mobility data for **TPQIr** or **TPQIr-ET**

| Mobility ( $\mu$ )                                              | TPQIr                  | TPQIr-ET               |
|-----------------------------------------------------------------|------------------------|------------------------|
| hole ( $\mu_{\text{h}}$ , cm <sup>2</sup> /Vs) <sup>a</sup>     | 1.3 × 10 <sup>-4</sup> | 4.4 × 10 <sup>-5</sup> |
| electron ( $\mu_{\text{e}}$ , cm <sup>2</sup> /Vs) <sup>a</sup> | 4.2 × 10 <sup>-6</sup> | 3.5 × 10 <sup>-4</sup> |

<sup>a</sup>the mobility was calculated from the space charge limited current (SCLC).

**Table S2.** Comparison of our work with previous literature.

| Year        | Previous Literature | CIE coordinates (CIE <sub>x</sub> , CIE <sub>y</sub> ) | Luminous/Power Efficiency      | EQE            |
|-------------|---------------------|--------------------------------------------------------|--------------------------------|----------------|
| 2007        | Ref. 3              | (0.65, 0.34)                                           | 3 lm/W                         | 6.3%           |
| 2007        | Ref. 4              | -                                                      | 6.4 cd/A /3.2 lm/W             | -              |
| 2007        | Ref. 5              | (0.61, 0.38)                                           | 12.62 cd/A                     | 8.60 %         |
| 2007        | Ref. 6              | (0.65, 0.33)                                           | 12.7 cd/A,                     | 15.1%          |
| 2008        | Ref. 7              | (0.60, 0.29)                                           | 1.95 cd/A                      | -              |
| 2008        | Ref. 8              | (0.64, 0.36)                                           | 4.6 cd/A /0.67 lm/W            | -              |
| 2009        | Ref. 9              | (0.61, 0.32)                                           | 1.66 cd/A                      | -              |
| 2010        | Ref. 10             | (0.61, 0.38)                                           | 4.2 cd/A                       | 3.2%           |
| 2010        | Ref. 11             | (0.62, 0.36)                                           | 7.2 cd/A /2.3 lm/W             | -              |
| 2010        | Ref. 12             | (0.59, 0.39)                                           | 21 cd/A /11 lm/W               | 14.2%          |
| 2011        | Ref. 13             | (0.64, 0.36)                                           | 13.3 cd/A /8.6 lm/W            | 10.2%          |
| 2011        | Ref. 14             | -                                                      | 17 cd/A /10 lm/W               | 8.8%           |
| 2012        | Ref. 15             | (0.65, 0.35)                                           | 12 cd/A /7.9 lm/W              | 10.8%          |
| 2013        | Ref. 16             | (0.65, 0.34)                                           | 7.8 cd/A /5.4 lm/W             | 6.9%           |
| 2012        | Ref. 17             | (0.61, 0.39)                                           | ~12.2 cd/A /~5.1 lm/W          | ~15.3%         |
| <b>2014</b> | <b>Our work</b>     | <b>(0.67, 0.32)</b>                                    | <b>~17.20 cd/A /~6.72 lm/W</b> | <b>~20.59%</b> |

## References

1. M. Nonoyama, *J. Organomet. Chem.*, 1975, **86**, 263.
2. Y.-H. Chiuv and J.-H. Liu, *J. Polym. Sci. A. Polym. Chem.*, 2010, **48**, 3368.
3. Y. Ohmori, H. Kajii and Y. Hino, *J. Disp. Technol.*, 2007, **3**, 238-244.
4. T. J. Park, S. H. Jeong, W. S. Jeon, J.-J. Park, Y. K. Lee, J. H. Kwon and J. Jang, *SID DIGEST*, 2007, 892-895.
5. Y. Byun, Y.-Y. Lyu, R. R. Das, O. Kwon, T.-W. Lee and Y. J. Park, *Appl. Phys. Lett.*, 2007, **91**, 211106.
6. H. Kim, Y. Byun, R. R. Das, B.-K. Choi and P.-S. Ahn, *Appl. Phys. Lett.*, 2007, **91**, 093512.
7. Y. Zhou, Q. He, Y. Yang, H. Zhong, C. He, G. Sang, W. Liu, C. Yang, F. Bai and Y. Li, *Adv. Funct. Mater.*, 2008, **18**, 3299-3306.
8. Y. Tao, Q. Wang, C. Yang, K. Zhang, Q. Wang, T. Zou, J. Qin and D. Ma, *J. Mater. Chem.*, 2008, **18**, 4091-4096.
9. Y. Yang, Y. Zhou, Q. He, C. He, C. Yang, F. Bai and Y. Li, *J. Phys. Chem., B* 2009, **113**, 7745-7752.
10. L. He, L. Duan, J. Qiao, D. Zhang, L. Wang and Y. Qiu, *Org. Elect.*, 2010, **11**, 1185-1191.
11. M. Zhang, S. Xue, W. Dong, Q. Wang, T. Fei, C. Gu and Y. Ma, *Chem. Commun.*, 2010, **46**, 3923-3925.
12. H.-Y. Oh, C. Kulshreshtha, J. H. Kwon and S. Lee, *Org. Elect.*, 2010, **11**, 1624-1630.
13. M. Zhu, T. Ye, X. He, X. Cao, C. Zhong, D. Ma, J. Qin and C. Yang, *J. Mater. Chem.*, 2011, **21**, 9326-9331.

14. Y.-C. Chao, S.-Y. Huang, C.-Y. Chena, Y.-F. Chang, H.-F. Menga, F.-W. Yend, I.-F. Lind, H.-W. Zane and S.-F. Horng, *Synthetic Metals*, 2011, **161**, 148-152.
15. J. Chen, C. Shi, Q. Fu, F. Zhao, Y. Hu, Y. Feng and D. Ma, *J. Mater. Chem.*, 2012, **22**, 5164-5170.
16. C.-F. Wang, W.-Y. Hung, M.-H. Cheng, J.-S. Hwang, M.-K. Leung and K.-T. Wong, *Org. Elect.*, 2013, **14**, 1958-1965.
17. M. Zhu, Y. Li, S. Hu, C. Li, C. Yang, H. Wu, J. Qina and Y. Cao, *Chem. Commun.*, 2012, **48**, 2695–2697.
